# Supplementary material
Source: Springer Nature journal article supplement (https://www.springermedizin.de/resource/supplementary/13024_2014_541_MOESM1_ESM.pdf/9644352)
Supplement: MOESM1 [file 9644352]

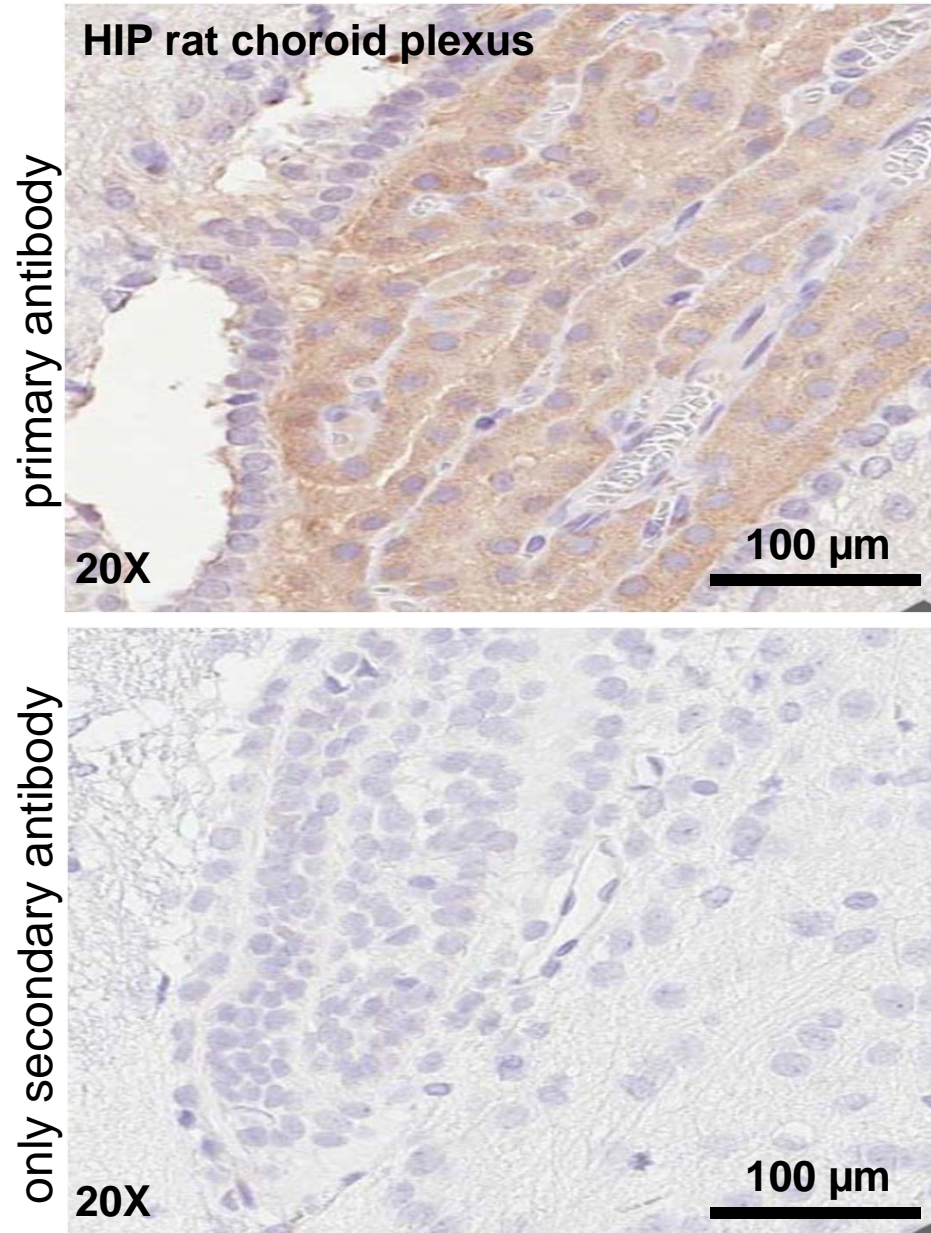

The specificity of anti-amylin antibody in immunohistochemistry studies was tested by incubating sections only with the secondary antibody.

**Fig S1**
